# Supplementary material for: The Transcription Factor FgAtrR Regulates Asexual and Sexual Development, Virulence, and DON Production and Contributes to Intrinsic Resistance to Azole Fungicides in Fusarium graminearum
Source: MDPI journal article supplement (doi:10.3390/biology11020326), 2022-02-18
Supplement: s1 [file s1]

# **A transcription factor FgAtrR regulates the asexual and sexual development, virulence, DON production and contributes to the intrinsic resistance to azole fungicides in *Fusarium graminearum***

Yanxiang Zhao<sup>1†</sup>, Hunlin Sun<sup>1†</sup>, Jingwen Li<sup>1</sup>, Chao Ju<sup>1</sup>, Jinguang Huang<sup>1\*</sup>

<sup>1</sup> College of Plant Health and Medicine and Key Lab of Integrated Crop Disease and Pest Management of Shandong Province, Qingdao Agricultural University, Qingdao 266109, Shandong Province, China

<sup>†</sup> These authors contributed equally to this work.

Correspondence: [jghuang@qau.edu.cn](mailto:jghuang@qau.edu.cn)

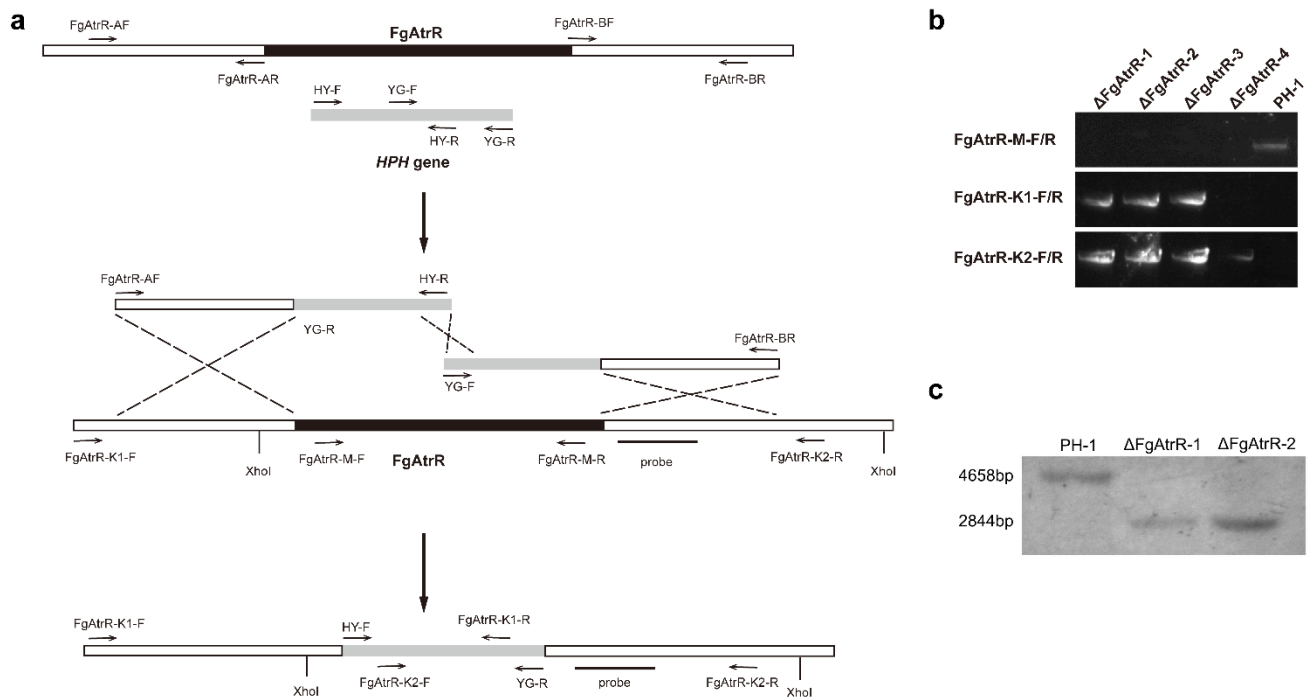

**Figure S1 Generation and identification of *FgAtrR* deletion mutants.** (a) Schematic representation of the gene deletion strategy. The *FgAtrR* gene was replaced by the hygromycin gene (*HPH*) through homologous recombination. Primer binding sites are labeled by arrows. (b) PCR analysis of transformants showed  $\Delta FgAtrR$ -1, -2, and -3 might be the correct *FgAtrR* deletion mutants. (c) Southern blot analysis of *FgAtrR* deletion mutants and the wild-type strain PH-1 confirmed the  $\Delta FgAtrR$ -1 and  $\Delta FgAtrR$ -2 were corrected. A 524 bp downstream fragment was used as a probe. The genomic DNA sample of each strain was digested with *Xho*I.

1 10 20 30 40 50 60 70 80 90 100 110 120 130 140 150  
FgAtrR .MDHM..A.GQ..V.PGMA..PPIMNHPP.QVFGSY..DGIPQ..LHPRIA.AQMFNDGAMM..LEDANDPKRRRIAR....ACDMCRKKKIKCDGKMPSCHICINMYKECVFTQVEKKRPFPGAKYIEGLENNRLRMHLLLSGLLDDDD...DLGALKRRIMRQHKES  
FOXG\_02014 .MDHM..G.GQ..V.PGMA..PPIMNHPP.QVFGSY..DGIPQ..LHPRIA.AQMFNDGAMM..LEDANDPKRRRIAR....ACDMCRKKKIKCDGKMPSCHICINMYKECVFTQVEKKRPFPGAKYIEGLENNRLRMHLLLSGLLDDDD...DLGALKRRIMRQHKES  
FPRO\_04832 .MDHM..V.PGMA..PPIMNHPP.QVFGSY..DGIPQ..LHPRIA.AQMFNDGAMM..LEDANDPKRRRIAR....ACDMCRKKKIKCDGKMPSCHICINMYKECVFTQVEKKRPFPGAKYIEGLENNRLRMHLLLSGLLDDDD...DLGALKRRIMRQHKES  
FFUJ\_03061 .MDHM..G.GQ..V.PGMA..PPIMNHPP.QVFGSY..DGIPQ..LHPRIA.AQMFNDGAMM..LEDANDPKRRRIAR....ACDMCRKKKIKCDGKMPSCHICINMYKECVFTQVEKKRPFPGAKYIEGLENNRLRMHLLLSGLLDDDD...DLGALKRRIMRQHKES  
NCU01478 .MDHLLHGQ..MP.NA..P.LLP..P.OIFGGYEHGIPQQLPHDLAVAQMGHGL..LDDDEAKRRRIAR....ACDMCRKKKIKCDGKLPACHICINMYKDDCVFTQVEKKRPFPGAKYIEGLENNRLRMHLLLSGLLDDDDNGATDLGLTLEKRAKTAQS  
MGG\_07450 .MDRM..G.GQ..MPFMG..APPIMNHPP.QVIFGGY..DGMFMQ..LFFPMT..AHMPADHSTL..LDDANEAKRRRIAR....ACDMCRKKKIKCDGKLPACHICINMYKDDCVFTQVEKKRPFPGAKYIEGLENNRLRMHLLLSGLLDDDDGGTDLGLTLEKRAKRNRS  
GLRG\_03129 .MDHM..G.GQ..MPHMGAPPPIMNHPP.QVIFGGYTPDGMPPVQHMPPLA.AHMPFDDSTL..LDDANEAKRRRIAR....ACDMCRKKKIKCDGKLPACHICINMYKDDCVFTQVEKKRPFPGAKYIEGLENNRLRMHLLLSGLLDDDDGGTDLGLTLEKRAKQQS  
VDAG\_08521 .MDRM..G.GQ..MPHMGHPPIMNHPP.QVIFGGYTPDGMPIQHMPPLA.AHMPFDDSTL..LDDANEAKRRRIAR....ACDMCRKKKIKCDGKLPACHICINMYKDDCVFTQVEKKRPFPGAKYIEGLENNRLRMHLLLSGLLDDDDGGTDLGLTLEKRAKQQS  
BCIN\_03g02160 .MDSMHGHNTTMTFPGIS.APPILNPP.QVIFGGYVADGLPISALP..DLN.GPFGD.GTL..LDEANEAKRRRIAR....ACDMCRKKKIKCDGKLPACHICINMYKDDCVFTQVEKKRPFPGAKYIEGLENNRLRMHLLLSGLLDDDDGGTDLGLTLEKRAKQQS  
PDIP\_71050 .MDGLGDE..G.GFD..GPPIMNHPP.QVIFGGY..GSHG..G..L..GSMYDD..SMMGA..LDEANEAKRRRIAR....ACDMCRKKKIKCDGKLPACHICINMYKDDCVFTQVEKKRPFPGAKYIEGLENNRLRMHLLLSGLLDDDDGGTDLGLTLEKRAKQQS  
AfU2g02690 .MDGLGDE..G.GFD..GPPIMNHPP.QVIFGGY..GSHG..G..L..GSMYDD..SMMGA..LDEANEAKRRRIAR....ACDMCRKKKIKCDGKLPACHICINMYKDDCVFTQVEKKRPFPGAKYIEGLENNRLRMHLLLSGLLDDDDGGTDLGLTLEKRAKQQS  
AO9002600614 .MDGMGDE..G.GFD..GPPIMNHPP.QVIFGGY..GSHG..G..L..GSMYDD..SMMGA..LDEANEAKRRRIAR....ACDMCRKKKIKCDGKLPACHICINMYKDDCVFTQVEKKRPFPGAKYIEGLENNRLRMHLLLSGLLDDDDGGTDLGLTLEKRAKQQS

160 170 180 190 200 210 220 230 240 250 260 270 280 290 300 310 320  
FgAtrR .RQASMAVGSGPNPSTHSTGAPS.AIDASAMTFQSCLTSPNPIVKBDRKRSATPAPSTAPSTAPANPANGEEVKEFEVEVASEMCMCLVNNGETRYIGSSSGFSIFSPKGVQVWVNKTGDSQRTISDISVDDHKTWNWKBEVSDIFPQRFVFPPLPPKEAISLLKQ  
FOXG\_02014 .RQVSMFAASNPSPSTSGTSGPSAAADGGEMTFQSCLTSPK...DKRKSATPAPSTAPSTAPAPANVEEIKQOEVEVASEMCMCLVNNGETRYIGSSSGFSIFSPKGVQVWVNKTGDSQRTISDISVDDHKTWNWKBEVSDIFPQRFVFPPLPPKEAISLLKQ  
FPRO\_04832 .RQVSMFAASNPSPSTSGTSGPSAAADGGEMTFQSCLTSPK...DKRKSATPAPSTAPSTAPAPANVDDIKQOEVEVASEMCMCLVNNGETRYIGSSSGFSIFSPKGVQVWVNKTGDSQRTISDISVDDHKTWNWKBEVSDIFPQRFVFPPLPPKEAISLLKQ  
FFUJ\_03061 .RQVSMFAASNPSPSTSGTSGPSAAADGGEMTFQSCLTSPK...DKRKSATPAPSTAPSTAPAPANVDDIKQOEVEVASEMCMCLVNNGETRYIGSSSGFSIFSPKGVQVWVNKTGDSQRTISDISVDDHKTWNWKBEVSDIFPQRFVFPPLPPKEAISLLKQ  
NCU01478 .RQTSQAAASNPSPSTSGTSGPSAAAS...Q.DGNNSTPRSLASPLP...LAPRDX...L.GEKRASTAPK...KEKEQVEVASEMCMCLVNNGETRYIGSSSGFSIFSPKGVQVWVNKTGDSQRTISDISVDDHKTWNWKBEVSDIFPQRFVFPPLPPKEAISLLKQ  
MGG\_07450 .RQASMAATSPSTPSQTASG...Q.DGSGTPQSALASP...LPRMDK...L.DKDERRSLTPAK...KEKEQVEVASEMCMCLVNNGETRYIGSSSGFSIFSPKGVQVWVNKTGDSQRTISDISVDDHKTWNWKBEVSDIFPQRFVFPPLPPKEAISLLKQ  
GLRG\_03129 .RQASQAF.SNPSTPSQTASG...Q.NDRATPHSGAESPL...LSTKDSHKEAKDGDKHMAVSE...LKEKEQVEVASEMCMCLVNNGETRYIGSSSGFSIFSPKGVQVWVNKTGDSQRTISDISVDDHKTWNWKBEVSDIFPQRFVFPPLPPKEAISLLKQ  
VDAG\_08521 .RQASQAA.SNPSTPSQALASG...L.TRESTSTPQSCLTSP...LBPKE...L.EKKSTVSEAP...LKEKEQVEVASEMCMCLVNNGETRYIGSSSGFSIFSPKGVQVWVNKTGDSQRTISDISVDDHKTWNWKBEVSDIFPQRFVFPPLPPKEAISLLKQ  
BCIN\_03g02160 .RQASVAF.SNPSTPSQTASG...L.TRESTSTPQSCLTSP...LBPKE...L.EKKSTVSEAP...LKEKEQVEVASEMCMCLVNNGETRYIGSSSGFSIFSPKGVQVWVNKTGDSQRTISDISVDDHKTWNWKBEVSDIFPQRFVFPPLPPKEAISLLKQ  
PDIP\_71050 .RQASVAF.SNPSTPSQTASG...L.TRESTSTPQSCLTSP...LBPKE...L.EKKSTVSEAP...LKEKEQVEVASEMCMCLVNNGETRYIGSSSGFSIFSPKGVQVWVNKTGDSQRTISDISVDDHKTWNWKBEVSDIFPQRFVFPPLPPKEAISLLKQ  
AfU2g02690 .RQASVAF.SNPSTPSQTASG...L.TRESTSTPQSCLTSP...LBPKE...L.EKKSTVSEAP...LKEKEQVEVASEMCMCLVNNGETRYIGSSSGFSIFSPKGVQVWVNKTGDSQRTISDISVDDHKTWNWKBEVSDIFPQRFVFPPLPPKEAISLLKQ  
AO9002600614 .RQASVAF.SNPSTPSQTASG...L.TRESTSTPQSCLTSP...LBPKE...L.EKKSTVSEAP...LKEKEQVEVASEMCMCLVNNGETRYIGSSSGFSIFSPKGVQVWVNKTGDSQRTISDISVDDHKTWNWKBEVSDIFPQRFVFPPLPPKEAISLLKQ

330 340 350 360 370 380 390 400 410 420 430 440 450 460 470 480 490  
FgAtrR .DYDENFNCFFPLHQDTFMHLYVQYSDPYEGSGWASLNCALAIHAHRLRVMSNLVQDEDKAWGYLKNAGVPELTMRNTDLSVQALLGALHLOGTNPQPFLLVSAAMRLASIGLHKRGTFGNLNPTEIQRRKRVFVIAVMLDKDCLRGRPPAQDDDMNV  
FOXG\_02014 .DYDENFNCFFPLHQDTFMHLYVQYSDPYEGSGWASLNCALAIHAHRLRVMSNLVQDEDKAWGYLKNAGVPELTMRNTDLSVQALLGALHLOGTNPQPFLLVSAAMRLASIGLHKRGTFGNLNPTEIQRRKRVFVIAVMLDKDCLRGRPPAQDDDMNV  
FPRO\_04832 .DYDENFNCFFPLHQDTFMHLYVQYSDPYEGSGWASLNCALAIHAHRLRVMSNLVQDEDKAWGYLKNAGVPELTMRNTDLSVQALLGALHLOGTNPQPFLLVSAAMRLASIGLHKRGTFGNLNPTEIQRRKRVFVIAVMLDKDCLRGRPPAQDDDMNV  
FFUJ\_03061 .DYDENFNCFFPLHQDTFMHLYVQYSDPYEGSGWASLNCALAIHAHRLRVMSNLVQDEDKAWGYLKNAGVPELTMRNTDLSVQALLGALHLOGTNPQPFLLVSAAMRLASIGLHKRGTFGNLNPTEIQRRKRVFVIAVMLDKDCLRGRPPAQDDDMNV  
NCU01478 .DYDENFNCFFPLHQDTFMHLYVQYSDPYEGSGWASLNCALAIHAHRLRVMSNLVQDEDKAWGYLKNAGVPELTMRNTDLSVQALLGALHLOGTNPQPFLLVSAAMRLASIGLHKRGTFGNLNPTEIQRRKRVFVIAVMLDKDCLRGRPPAQDDDMNV  
MGG\_07450 .DYDENFNCFFPLHQDTFMHLYVQYSDPYEGSGWASLNCALAIHAHRLRVMSNLVQDEDKAWGYLKNAGVPELTMRNTDLSVQALLGALHLOGTNPQPFLLVSAAMRLASIGLHKRGTFGNLNPTEIQRRKRVFVIAVMLDKDCLRGRPPAQDDDMNV  
GLRG\_03129 .DYDENFNCFFPLHQDTFMHLYVQYSDPYEGSGWASLNCALAIHAHRLRVMSNLVQDEDKAWGYLKNAGVPELTMRNTDLSVQALLGALHLOGTNPQPFLLVSAAMRLASIGLHKRGTFGNLNPTEIQRRKRVFVIAVMLDKDCLRGRPPAQDDDMNV  
VDAG\_08521 .DYDENFNCFFPLHQDTFMHLYVQYSDPYEGSGWASLNCALAIHAHRLRVMSNLVQDEDKAWGYLKNAGVPELTMRNTDLSVQALLGALHLOGTNPQPFLLVSAAMRLASIGLHKRGTFGNLNPTEIQRRKRVFVIAVMLDKDCLRGRPPAQDDDMNV  
BCIN\_03g02160 .DYDENFNCFFPLHQDTFMHLYVQYSDPYEGSGWASLNCALAIHAHRLRVMSNLVQDEDKAWGYLKNAGVPELTMRNTDLSVQALLGALHLOGTNPQPFLLVSAAMRLASIGLHKRGTFGNLNPTEIQRRKRVFVIAVMLDKDCLRGRPPAQDDDMNV  
PDIP\_71050 .DYDENFNCFFPLHQDTFMHLYVQYSDPYEGSGWASLNCALAIHAHRLRVMSNLVQDEDKAWGYLKNAGVPELTMRNTDLSVQALLGALHLOGTNPQPFLLVSAAMRLASIGLHKRGTFGNLNPTEIQRRKRVFVIAVMLDKDCLRGRPPAQDDDMNV  
AfU2g02690 .DYDENFNCFFPLHQDTFMHLYVQYSDPYEGSGWASLNCALAIHAHRLRVMSNLVQDEDKAWGYLKNAGVPELTMRNTDLSVQALLGALHLOGTNPQPFLLVSAAMRLASIGLHKRGTFGNLNPTEIQRRKRVFVIAVMLDKDCLRGRPPAQDDDMNV  
AO9002600614 .DYDENFNCFFPLHQDTFMHLYVQYSDPYEGSGWASLNCALAIHAHRLRVMSNLVQDEDKAWGYLKNAGVPELTMRNTDLSVQALLGALHLOGTNPQPFLLVSAAMRLASIGLHKRGTFGNLNPTEIQRRKRVFVIAVMLDKDCLRGRPPAQDDDMNV

500 510 520 530 540 550 560 570 580 590 600 610 620 630 640 650 660  
FgAtrR .ELDDADPENNIGNIPADCKGMNLFPRMCEPATIESIVYRLYSVQATKQSDGELNLTIGELDKLEWKKDIPDFRPEHEIKASHPTLLHVVVHLHYNGLTTIHRMSVHHGYWTSRLNNAIQGLNARPLNPRVFSAAALCTAARASVLLKYVQGGFACVWMI  
FOXG\_02014 .ELDDADPENNIGNIPADCKGMNLFPRMCEPATIESIVYRLYSVQATKQSDGELNLTIGELDKLEWKKDIPDFRPEHEIKASHPTLLHVVVHLHYNGLTTIHRMSVHHGYWTSRLNNAIQGLNARPLNPRVFSAAALCTAARASVLLKYVQGGFACVWMI  
FPRO\_04832 .ELDDADPENNIGNIPADCKGMNLFPRMCEPATIESIVYRLYSVQATKQSDGELNLTIGELDKLEWKKDIPDFRPEHEIKASHPTLLHVVVHLHYNGLTTIHRMSVHHGYWTSRLNNAIQGLNARPLNPRVFSAAALCTAARASVLLKYVQGGFACVWMI  
FFUJ\_03061 .ELDDADPENNIGNIPADCKGMNLFPRMCEPATIESIVYRLYSVQATKQSDGELNLTIGELDKLEWKKDIPDFRPEHEIKASHPTLLHVVVHLHYNGLTTIHRMSVHHGYWTSRLNNAIQGLNARPLNPRVFSAAALCTAARASVLLKYVQGGFACVWMI  
NCU01478 .ELDDADPENNIGNIPADCKGMNLFPRMCEPATIESIVYRLYSVQATKQSDGELNLTIGELDKLEWKKDIPDFRPEHEIKASHPTLLHVVVHLHYNGLTTIHRMSVHHGYWTSRLNNAIQGLNARPLNPRVFSAAALCTAARASVLLKYVQGGFACVWMI  
MGG\_07450 .ELDDADPENNIGNIPADCKGMNLFPRMCEPATIESIVYRLYSVQATKQSDGELNLTIGELDKLEWKKDIPDFRPEHEIKASHPTLLHVVVHLHYNGLTTIHRMSVHHGYWTSRLNNAIQGLNARPLNPRVFSAAALCTAARASVLLKYVQGGFACVWMI  
GLRG\_03129 .ELDDADPENNIGNIPADCKGMNLFPRMCEPATIESIVYRLYSVQATKQSDGELNLTIGELDKLEWKKDIPDFRPEHEIKASHPTLLHVVVHLHYNGLTTIHRMSVHHGYWTSRLNNAIQGLNARPLNPRVFSAAALCTAARASVLLKYVQGGFACVWMI  
VDAG\_08521 .ELDDADPENNIGNIPADCKGMNLFPRMCEPATIESIVYRLYSVQATKQSDGELNLTIGELDKLEWKKDIPDFRPEHEIKASHPTLLHVVVHLHYNGLTTIHRMSVHHGYWTSRLNNAIQGLNARPLNPRVFSAAALCTAARASVLLKYVQGGFACVWMI  
BCIN\_03g02160 .ELDDADPENNIGNIPADCKGMNLFPRMCEPATIESIVYRLYSVQATKQSDGELNLTIGELDKLEWKKDIPDFRPEHEIKASHPTLLHVVVHLHYNGLTTIHRMSVHHGYWTSRLNNAIQGLNARPLNPRVFSAAALCTAARASVLLKYVQGGFACVWMI  
PDIP\_71050 .ELDDADPENNIGNIPADCKGMNLFPRMCEPATIESIVYRLYSVQATKQSDGELNLTIGELDKLEWKKDIPDFRPEHEIKASHPTLLHVVVHLHYNGLTTIHRMSVHHGYWTSRLNNAIQGLNARPLNPRVFSAAALCTAARASVLLKYVQGGFACVWMI  
AfU2g02690 .ELDDADPENNIGNIPADCKGMNLFPRMCEPATIESIVYRLYSVQATKQSDGELNLTIGELDKLEWKKDIPDFRPEHEIKASHPTLLHVVVHLHYNGLTTIHRMSVHHGYWTSRLNNAIQGLNARPLNPRVFSAAALCTAARASVLLKYVQGGFACVWMI  
AO9002600614 .ELDDADPENNIGNIPADCKGMNLFPRMCEPATIESIVYRLYSVQATKQSDGELNLTIGELDKLEWKKDIPDFRPEHEIKASHPTLLHVVVHLHYNGLTTIHRMSVHHGYWTSRLNNAIQGLNARPLNPRVFSAAALCTAARASVLLKYVQGGFACVWMI

670 680 690 700 710 720 730 740 750 760 770 780 790 800 810  
FgAtrR .LYPVSALVTLFNIQNDPDRASDTRLNMNVVFLSMGQABEAGGVHMDIGICAEFERAKAVLDIAEKEQSSRRKRKNQD.....SANKSSANVFAARAAKESVRSASVSTAHRRS...SQAQLSPNGSDSM.....GAFSV..GTPMNDLSPSAMSAG  
FOXG\_02014 .LYPVSALVTLFNIQNDPDRASDTRLNMNVVFLSMGQABEAGGVHMDIGICAEFERAKAVLDIAEKEQSSRRKRKNQD.....TNKSSVNAITATARQSTAESATTSVSSSQRRS...SQAQLSPNGASAM.....GOFSM..GSPMNDPSPSAMSAG  
FPRO\_04832 .LYPVSALVTLFNIQNDPDRASDTRLNMNVVFLSMGQABEAGGVHMDIGICAEFERAKAVLDIAEKEQSSRRKRKNQD.....TNKSSVNAITATARQSTAESATTSVSSSQRRS...SQAQLSPNGASAM.....GOFSM..GSPMNDPSPSAMSAG  
FFUJ\_03061 .LYPVSALVTLFNIQNDPDRASDTRLNMNVVFLSMGQABEAGGVHMDIGICAEFERAKAVLDIAEKEQSSRRKRKNQD.....TNKSSVNAITATARQSTAESATTSVSSSQRRS...SQAQLSPNGASAM.....GOFSM..GSPMNDPSPSAMSAG  
NCU01478 .LYPVSALVTLFNIQNDPDRASDTRLNMNVVFLSMGQABEAGGVHMDIGICAEFERAKAVLDIAEKEQSSRRKRKNQD.....TNKSSVNAITATARQSTAESATTSVSSSQRRS...SQAQLSPNGASAM.....GOFSM..GSPMNDPSPSAMSAG  
MGG\_07450 .LYPVSALVTLFNIQNDPDRASDTRLNMNVVFLSMGQABEAGGVHMDIGICAEFERAKAVLDIAEKEQSSRRKRKNQD.....TNKSSVNAITATARQSTAESATTSVSSSQRRS...SQAQLSPNGASAM.....GOFSM..GSPMNDPSPSAMSAG  
GLRG\_03129 .LYPVSALVTLFNIQNDPDRASDTRLNMNVVFLSMGQABEAGGVHMDIGICAEFERAKAVLDIAEKEQSSRRKRKNQD.....TNKSSVNAITATARQSTAESATTSVSSSQRRS...SQAQLSPNGASAM.....GOFSM..GSPMNDPSPSAMSAG  
VDAG\_08521 .LYPVSALVTLFNIQNDPDRASDTRLNMNVVFLSMGQABEAGGVHMDIGICAEFERAKAVLDIAEKEQSSRRKRKNQD.....TNKSSVNAITATARQSTAESATTSVSSSQRRS...SQAQLSPNGASAM.....GOFSM..GSPMNDPSPSAMSAG  
BCIN\_03g02160 .LYPVSALVTLFNIQNDPDRASDTRLNMNVVFLSMGQABEAGGVHMDIGICAEFERAKAVLDIAEKEQSSRRKRKNQD.....TNKSSVNAITATARQSTAESATTSVSSSQRRS...SQAQLSPNGASAM.....GOFSM..GSPMNDPSPSAMSAG  
PDIP\_71050 .LYPVSALVTLFNIQNDPDRASDTRLNMNVVFLSMGQABEAGGVHMDIGICAEFERAKAVLDIAEKEQSSRRKRKNQD.....TNKSSVNAITATARQSTAESATTSVSSSQRRS...SQAQLSPNGASAM.....GOFSM..GSPMNDPSPSAMSAG  
AfU2g02690 .LYPVSALVTLFNIQNDPDRASDTRLNMNVVFLSMGQABEAGGVHMDIGICAEFERAKAVLDIAEKEQSSRRKRKNQD.....TNKSSVNAITATARQSTAESATTSVSSSQRRS...SQAQLSPNGASAM.....GOFSM..GSPMNDPSPSAMSAG  
AO9002600614 .LYPVSALVTLFNIQNDPDRASDTRLNMNVVFLSMGQABEAGGVHMDIGICAEFERAKAVLDIAEKEQSSRRKRKNQD.....TNKSSVNAITATARQSTAESATTSVSSSQRRS...SQAQLSPNGASAM.....GOFSM..GSPMNDPSPSAMSAG

820 830 840 850 860 870 880 890  
FgAtrR .WPEFVPVQPHNG.....DYDAMSQYEGSGSMH.....SPGMVPSA.FQODLLQDQLTSMTLTDWAWMPTGAYFTVNGNFGGD.....  
FOXG\_02014 .WPEFVPVQPHNG.....DYDAMSQYEGSGSMH.....SPGMVPSA.FQODLLQDQLTSMTLTDWAWMPTGAYFTVNGNFGGD.....  
FPRO\_04832 .WPEFVPVQPHNG.....DYDAMSQYEGSGSMH.....SPGMVPSA.FQODLLQDQLTSMTLTDWAWMPTGAYFTVNGNFGGD.....  
FFUJ\_03061 .WPEFVPVQPHNG.....DYDAMSQYEGSGSMH.....SPGMVPSA.FQODLLQDQLTSMTLTDWAWMPTGAYFTVNGNFGGD.....  
NCU01478 .WTDGPTGMEGIDY.....NMADLTGFGAIAIMNMPADFVMDGLADSPAGDPFRI.YQOQMLQDQLSLDLTLDWAWMPTGAYFTVNGNFGGD.....  
MGG\_07450 .YVPVAGAGMEGMVYGG.....NVNFAETGFTADIR.....QSVPPATAYTQPHLLQDQLSLDLTLDWAWMPTGAYFTVNGNFGGD.....  
GLRG\_03129 .WPEFVPVQPHNG.....DYDAMSQYEGSGSMH.....SPGMVPSA.FQODLLQDQLTSMTLTDWAWMPTGAYFTVNGNFGGD.....  
VDAG\_08521 .WPDQDMSQDQPS.....SPGDVTFGFGNGGIR.....SPQNMIGVTFQODLLQDQLSLDLTLDWAWMPTGAYFTVNGNFGGD.....  
BCIN\_03g02160 .WQDXY.GPGGGFMGONTGTFPGVOGTTNGEF.....NSPNLNLA.FQODLLQDQLSLDLTLDWAWMPTGAYFTVNGNFGGD.....  
PDIP\_71050 .WQDXY.GPGGGFMGONTGTFPGVOGTTNGEF.....NSPNLNLA.FQODLLQDQLSLDLTLDWAWMPTGAYFTVNGNFGGD.....  
AfU2g02690 .WQDXY.GPGGGFMGONTGTFPGVOGTTNGEF.....NSPNLNLA.FQODLLQDQLSLDLTLDWAWMPTGAYFTVNGNFGGD.....  
AO9002600614 .WQDXY.GPGGGFMGONTGTFPGVOGTTNGEF.....NSPNLNLA.FQODLLQDQLSLDLTLDWAWMPTGAYFTVNGNFGGD.....

**Figure S2 Multiple sequence alignment of FgAtrR with homologs in other filamentous fungi.** Sequences for analysis are as follows: FgAtrR from *Fusarium graminearum*, FOXG\_02014 from *F. oxysporum* f. sp. *lycopersici*, FFUJ\_03061 from *F. fujikuroi*, FPRO\_04832 from *F. proliferatum*, NCU01478 from *Neurospora crassa*, MGG\_07450 from *Pyricularia oryzae*, BCIN\_03g02160 from *Botrytis cinerea*, PDIP\_71050 from *Penicillium digitatum*, Afu2g02690 from *Aspergillus fumigatus*, AO090026000614 from *A. oryzae*, VDAG\_08521 from *Verticillium dahliae*, GLRG\_03129 from *Colletotrichum graminicola*.

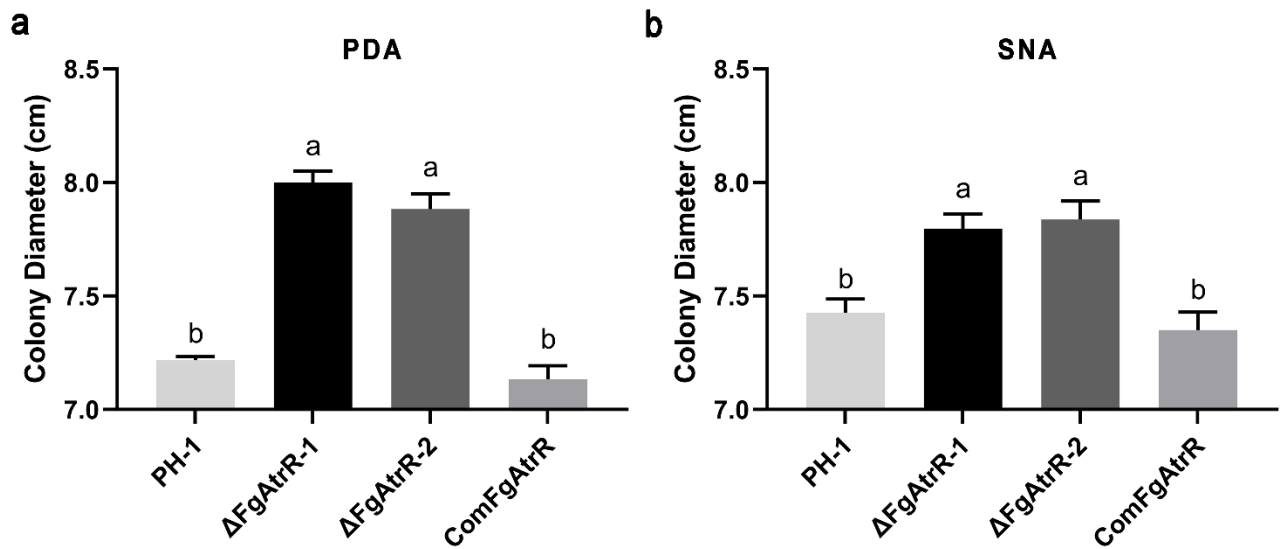

**Figure S3 Deletion of FgAtrR promotes the radial growth of *Fusarium graminearum*.** The colony diameter of each strain was measured after incubation for 96 h on PDA plates or 144 h on SNA plates. The experiment was repeated three times with three replicates each time. Linear bars denote standard errors of three experiments. The different letters on the bars indicate a significant difference at the  $p < 0.05$  level.

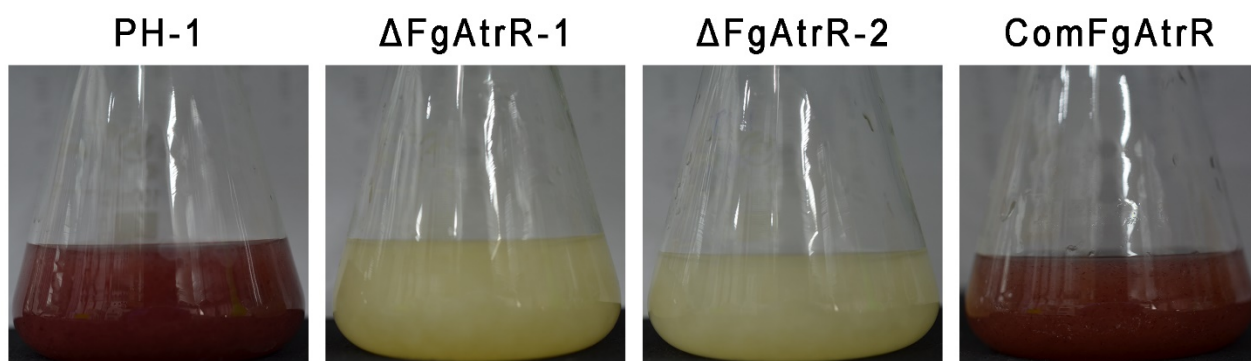

**Figure S4 Deletion of FgAtrR blocks the aurofusarin biosynthesis of *Fusarium graminearum* in PDB medium.** Each strain was cultured in flasks containing PDB medium at 25°C for 5 d.

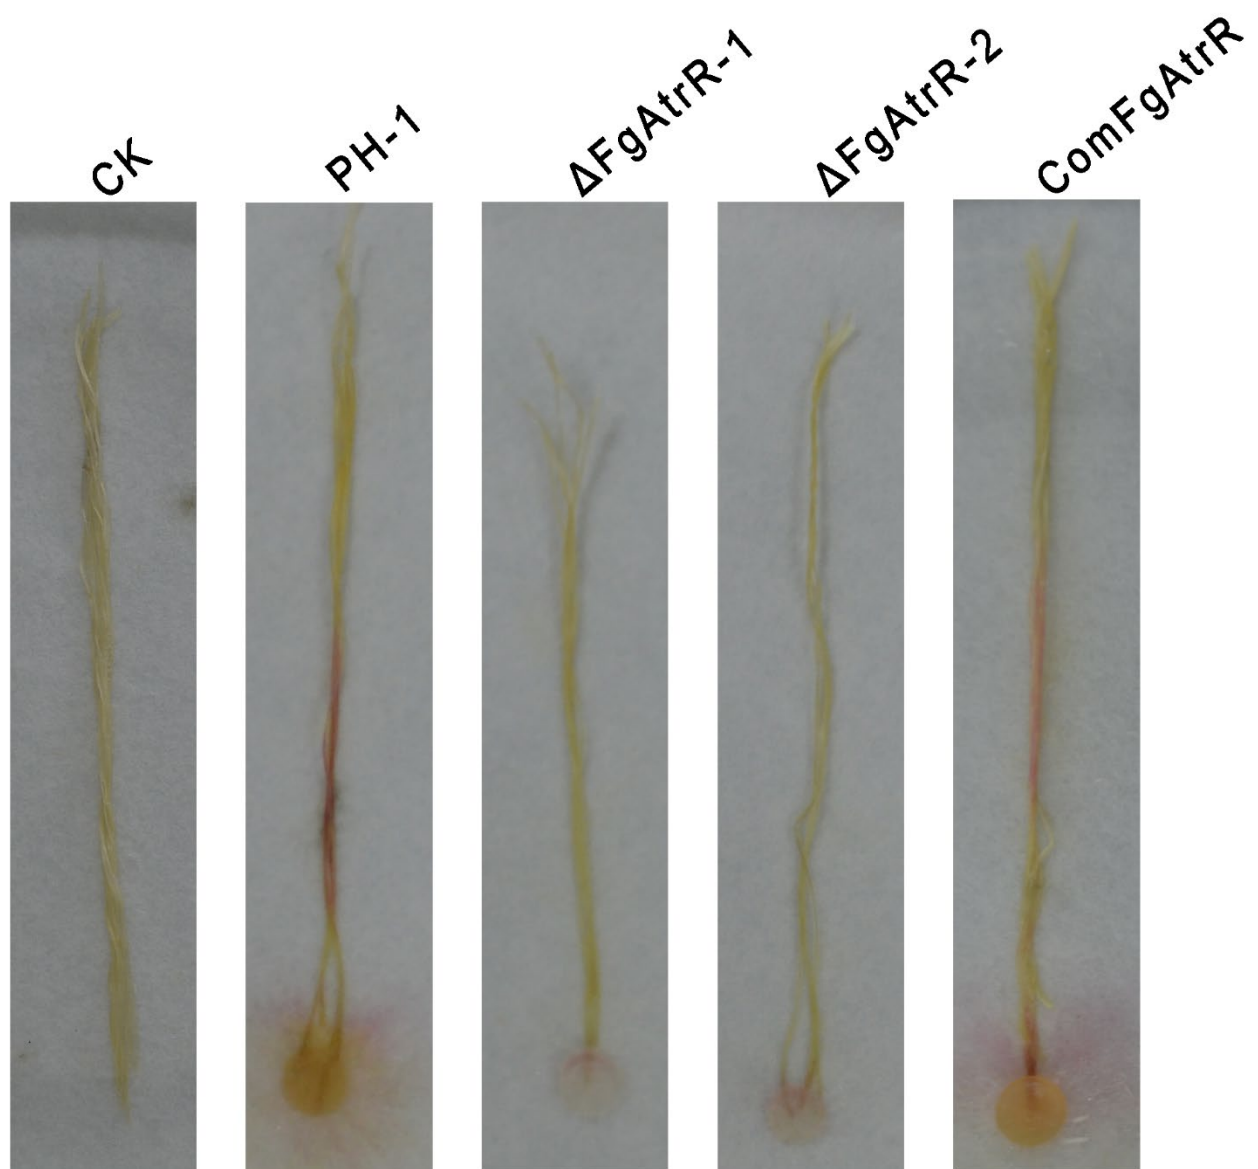

**Figure S5 Deletion of FgAtrR impairs the pathogenicity of *Fusarium graminearum* on corn silks.**

A mycelial plug was placed at one end of a bundle of silk corn. The photographs were taken after 7 days of incubation in a humid chamber at 25 °C.



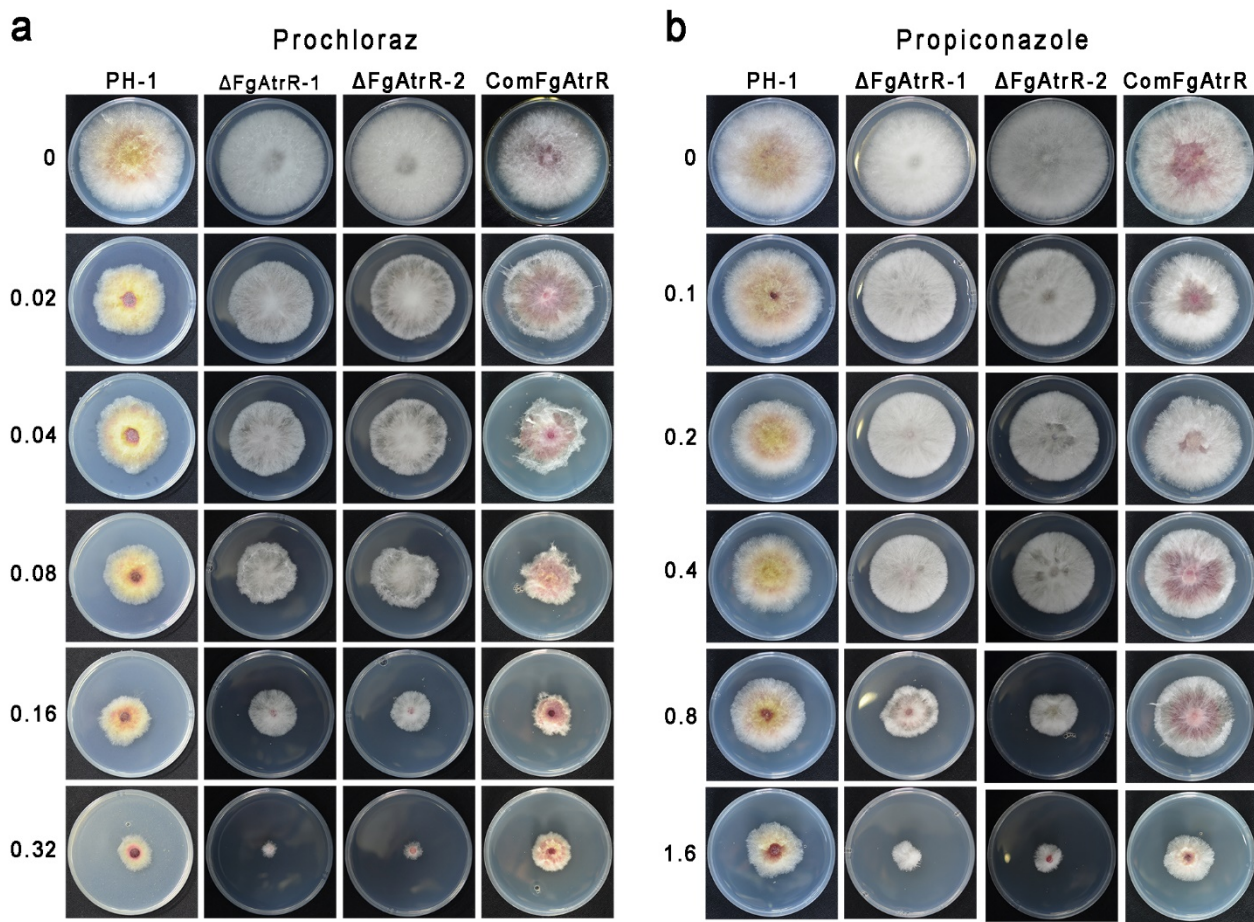

**Figure S6** The growth inhibition effect of azole fungicide prochloraz (a) or propiconazole (b) on the *Fusarium graminearum* PH-1, FgAtrR deletion mutants, and FgAtrR-complemented strain at different concentrations. The concentration (mg/L) was labeled on the left side of each pane.
